# Supplementary material for: Real-Time Release Testing of Herbal Extract Powder by Near-Infrared Spectroscopy considering the Uncertainty around Specification Limits
Source: Hindawi journal article supplement (doi:10.1155/2019/4139762), 2019-03-03
Supplement: f1 [file 4139762.f1.docx]

Appendix

**Table S1.** Predicted concentrations of *cryptotanshinone* validation samples expressed as mass content (%)

| Level | Repetition | Theoretical  concentration (%) | Predicted concentration (%) | | |
| --- | --- | --- | --- | --- | --- |
| Day 1 | Day 2 | Day 3 |
| 1 | 1  2  3  4  5 | 0.20 | 0.37  0.27  0.09  0.32  0.29 | 0.63  0.30  0.26  0.36  0.45 | 0.41  0.61  0.41  0.41  0.81 |
| 2 | 1  2  3  4  5 | 0.31 | 0.67  0.57  0.59  0.44  0.41 | 0.30  0.39  0.55  0.66  0.54 | 0.44  0.27  0.48  0.45  0.07 |
| 3 | 1  2  3  4  5 | 0.50 | 0.92  0.63  0.76  0.88  0.53 | 0.73  0.83  0.80  0.58  0.98 | 0.42  0.64  0.43  0.69  0.60 |
| 4 | 1  2  3  4  5 | 1.18 | 1.23  1.16  1.01  0.95  0.67 | 0.70  0.77  0.79  1.33  0.47 | 0.83  0.52  1.10  1.35  1.06 |
| 5 | 1  2  3  4  5 | 2.05 | 1.87  1.96  2.23  2.08  2.20 | 2.00  2.17  2.24  2.08  2.18 | 2.18  2.15  1.97  1.70  1.84 |
| 6 | 1  2  3  4  5 | 2.26 | 2.04  2.42  2.24  2.58  2.52 | 2.73  2.49  2.45  2.51  2.87 | 2.67  2.13  2.53  2.36  2.64 |
| 7 | 1  2  3  4  5 | 5.29 | 4.59  4.89  4.82  4.97  4.66 | 5.25  4.93  5.09  5.15  5.03 | 4.56  5.17  4.75  5.09  4.85 |
| 8 | 1  2  3  4  5 | 9.68 | 9.13  9.55  9.63  9.19  9.25 | 9.81  9.71  9.75  9.52  9.33 | 10.01  9.63  9.87  9.05  9.27 |

**Table S2.** Predicted concentrations of *tanshinoneⅡA* validation samples expressed as mass content (%)

| Level | Repetition | Theoretical  concentration (%) | Predicted concentration (%) | | |
| --- | --- | --- | --- | --- | --- |
| Day 1 | Day 2 | Day 3 |
| 1 | 1  2  3  4  5 | 0.10 | -0.18  0.08  0.02  -0.31  -0.48 | -0.29  -0.68  0.19  0.43  -1.10 | -0.60  0.02  -0.01  -0.04  0.03 |
| 2 | 1  2  3  4  5 | 0.15 | -0.81  -0.13  -0.09  0.10  -0.42 | 0.49  0.04  0.27  -0.65  0.13 | -0.68  -0.01  -0.29  -0.07  0.22 |
| 3 | 1  2  3  4  5 | 0.36 | -0.09  0.26  -0.38  0.21  0.37 | 0.89  -0.25  0.45  0.63  0.47 | 0.27  0.33  -0.07  0.20  0.33 |
| 4 | 1  2  3  4  5 | 0.54 | 0.72  0.95  0.76  0.71  0.86 | 0.45  0.84  1.00  1.25  0.54 | 1.24  1.02  0.61  0.63  1.22 |
| 5 | 1  2  3  4  5 | 2.04 | 0.99  2.19  1.30  1.77  1.78 | 1.64  1.94  1.97  1.68  1.84 | 1.23  1.78  1.55  1.08  1.23 |
| 6 | 1  2  3  4  5 | 6.03 | 6.16  5.69  6.15  5.91  5.89 | 6.61  5.54  6.28  5.64  5.33 | 6.44  6.17  5.44  6.28  5.71 |
| 7 | 1  2  3  4  5 | 18.76 | 17.93  18.64  18.50  18.32  16.82 | 18.49  19.18  18.67  18.51  18.35 | 19.39  18.02  18.56  17.45  18.20 |
| 8 | 1  2  3  4  5 | 27.64 | 26.27  26.27  25.88  25.94  26.96 | 27.35  26.89  26.47  26.57  26.94 | 25.74  26.53  26.40  26.93  25.63 |
